# Supplementary material for: Granular polyrotaxane microgels as injectable hydrogels for corneal tissue regeneration
Source: Royal Society of Chemistry journal article supplement (doi:10.1039/d4bm00409d), 2024-01-01
Supplement: d4bm00409d1.pdf [file d4bm00409d1.pdf]

# Granular Polyrotaxane Microgels As Injectable Hydrogels for Corneal Tissue Regeneration

*Antonio J. Feliciano*<sup>1a</sup>, *Yusra Alaoui Selsouli*<sup>1b</sup>, *Pamela Habibovic*<sup>1b</sup>, *Zeinab Niloofar Tahmasebi Birgani*<sup>1a,b</sup>, *Lorenzo Moroni*<sup>1a</sup>, *Matthew B. Baker*<sup>1a</sup>  
*1 Maastricht University, MERLN Institute for Technology-Inspired Regenerative Medicine, a Department of Complex Tissue Regeneration, Maastricht, Netherlands*  
*b Department of Instructive Biomaterial Engineering*

## Supplementary Information

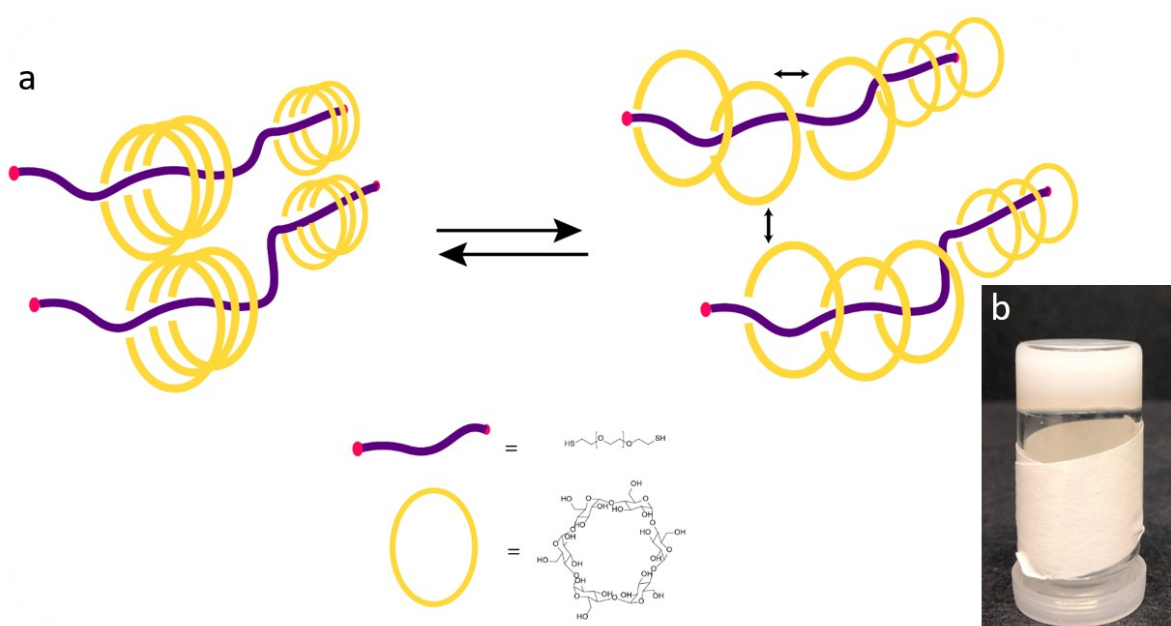

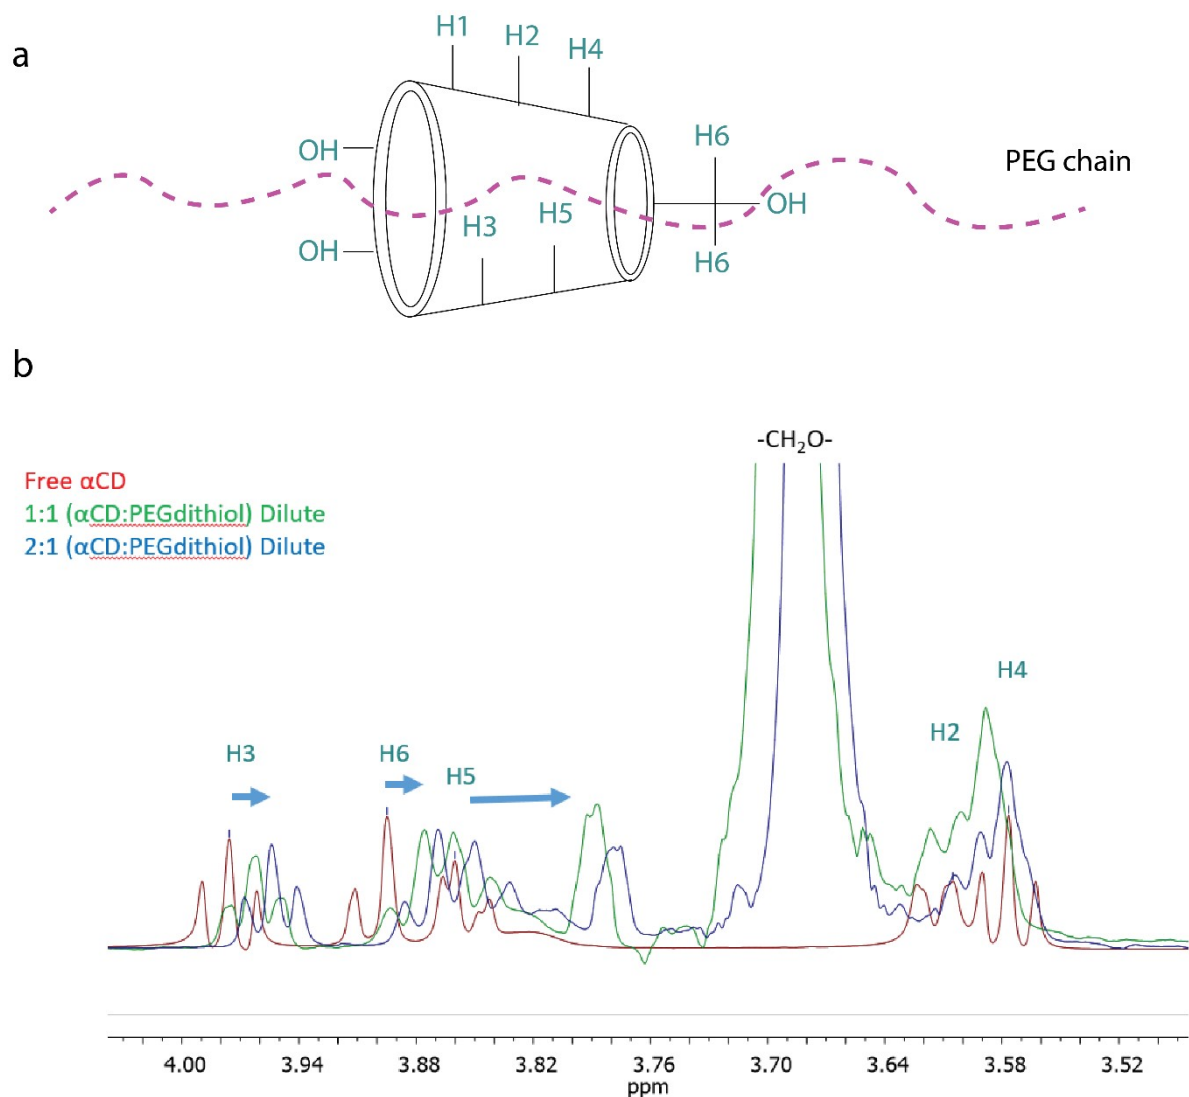

**Figure S2.** (a) Diagram of inclusion between CD macrocycle and PEG chain. (b) chemical shifts of  $\alpha$ CD and PEG in 1:1 and 2:1 ( $\alpha$ CD:PEG) ratios.

**Table S1.** Chemical shifts of protons indicating shifts between H3 and H5 protons indicating inclusion of PEG chain in CD.

|              |                                   | H1     | H3     | H6     | H5     | H2    | H4    |
|--------------|-----------------------------------|--------|--------|--------|--------|-------|-------|
| <b>Ratio</b> | <b>Free <math>\alpha</math>CD</b> | 5.040  | 3.976  | 3.894  | 3.860  | 3.614 | 3.577 |
| <b>1:1</b>   | <b>Complex</b>                    | 5.038  | 3.962  | 3.876  | 3.790  | 3.615 | 3.588 |
|              | <b><math>\Delta\delta</math></b>  | -0.002 | -0.014 | -0.018 | -0.070 | 0.001 | 0.011 |
| <b>2:1</b>   | <b>Complex</b>                    | 5.027  | 3.954  | 3.869  | 3.775  | 3.604 | 3.577 |
|              | <b><math>\Delta\delta</math></b>  | -0.013 | -0.022 | -0.025 | -0.085 | -0.01 | 0     |

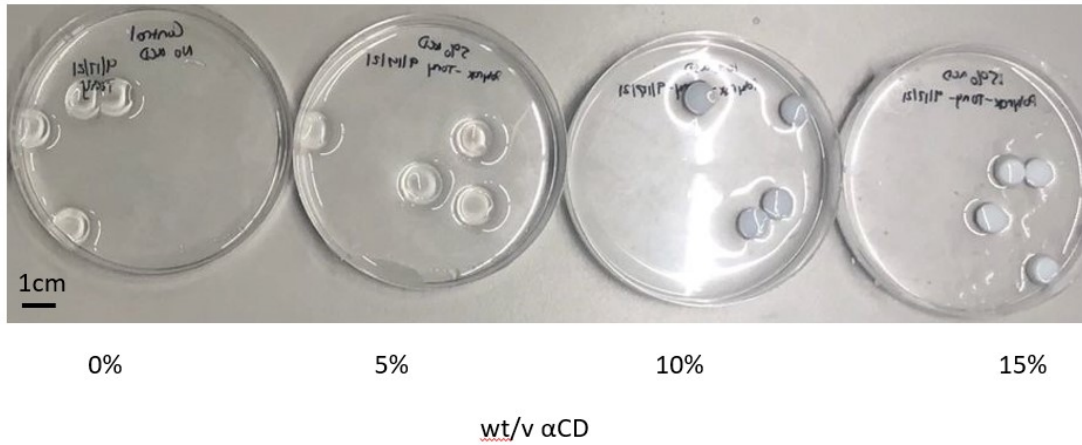

**Figure S3.** Synthesized bulk hydrogels after 2 days in PBS.

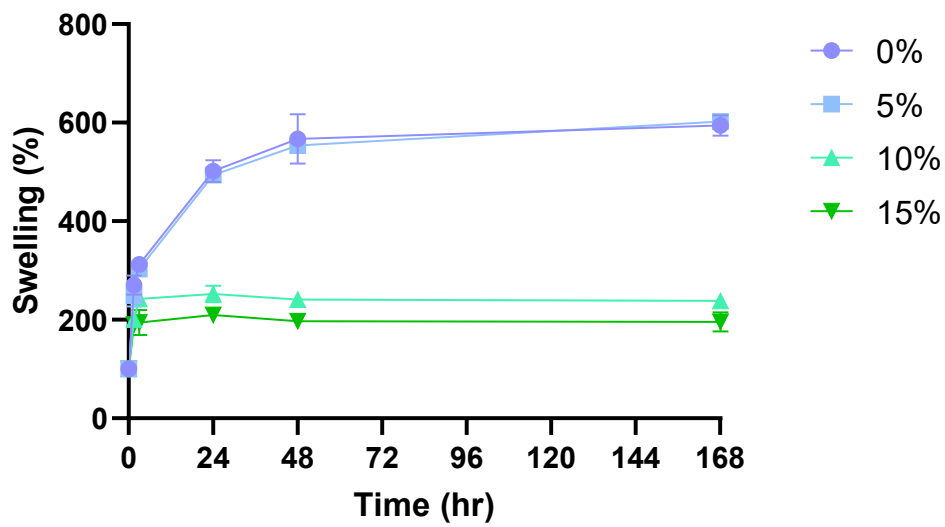

**Figure S4.** Swelling occurs the most with 0%  $\alpha$ CD due to PEG chains being completely free to swell. 15%  $\alpha$ CD has limited swelling due to secondary crosslinking between CDs.

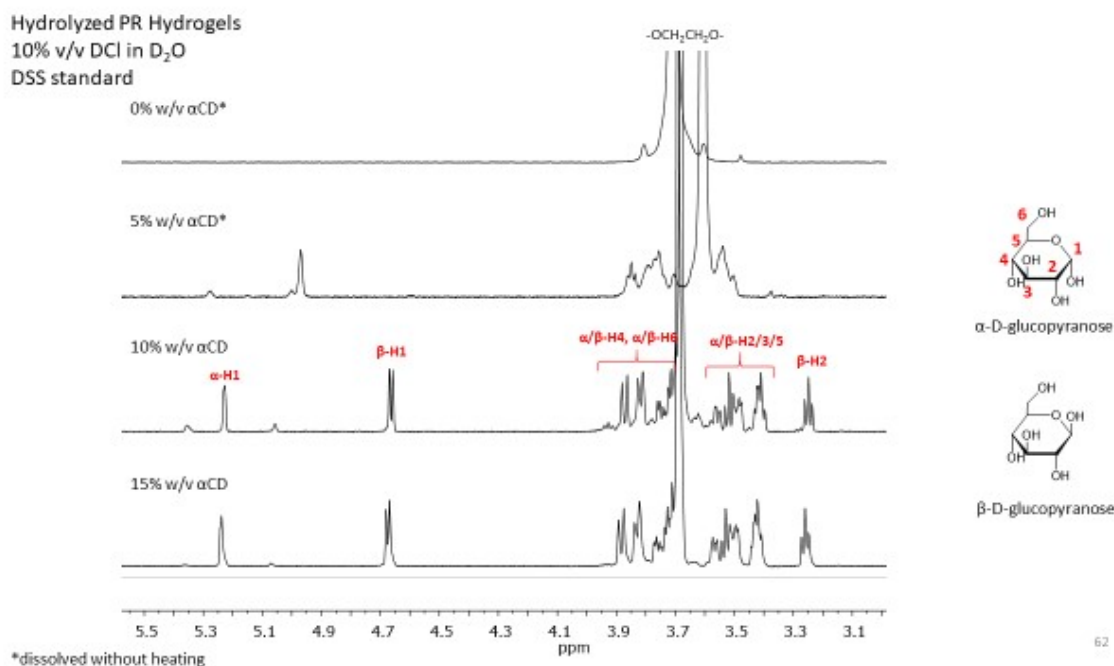

**Figure S5.** <sup>1</sup>H NMR of degraded polyrotaxane hydrogel to determine the ratio of  $\alpha$ CD to PEG in the final hydrogel.

**Table S2.** Calculated  $\alpha$ CDs per PEGdithiol.

| Sample | $\alpha$ CD-H1 integration | PEG integration | CD/PEG |
|--------|----------------------------|-----------------|--------|
| 0      | 0                          | -               | NA     |
| 5      | 1                          | 66,7            | 6      |
| 10     | 1,67                       | 27,9            | 23     |
| 15     | 1,65                       | 13,2            | 47     |

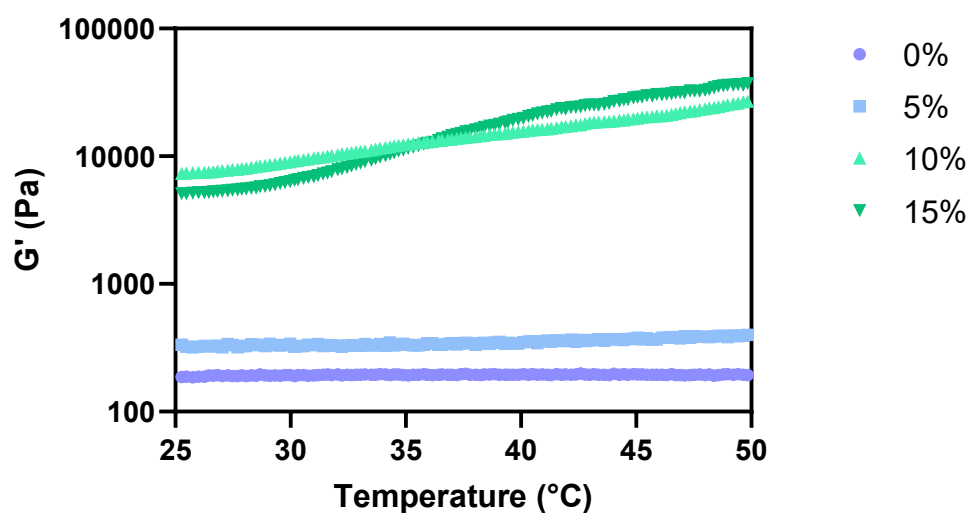

**Figure S6.** Thermoresponsiveness of bulk polyrotaxane gels. 10 and 15% wt/v  $\alpha$ CD show clear increase in  $G'$  with increasing  $T$  whereas 0, 5% are negligible. Rate of temperature increase: 1°C/min.

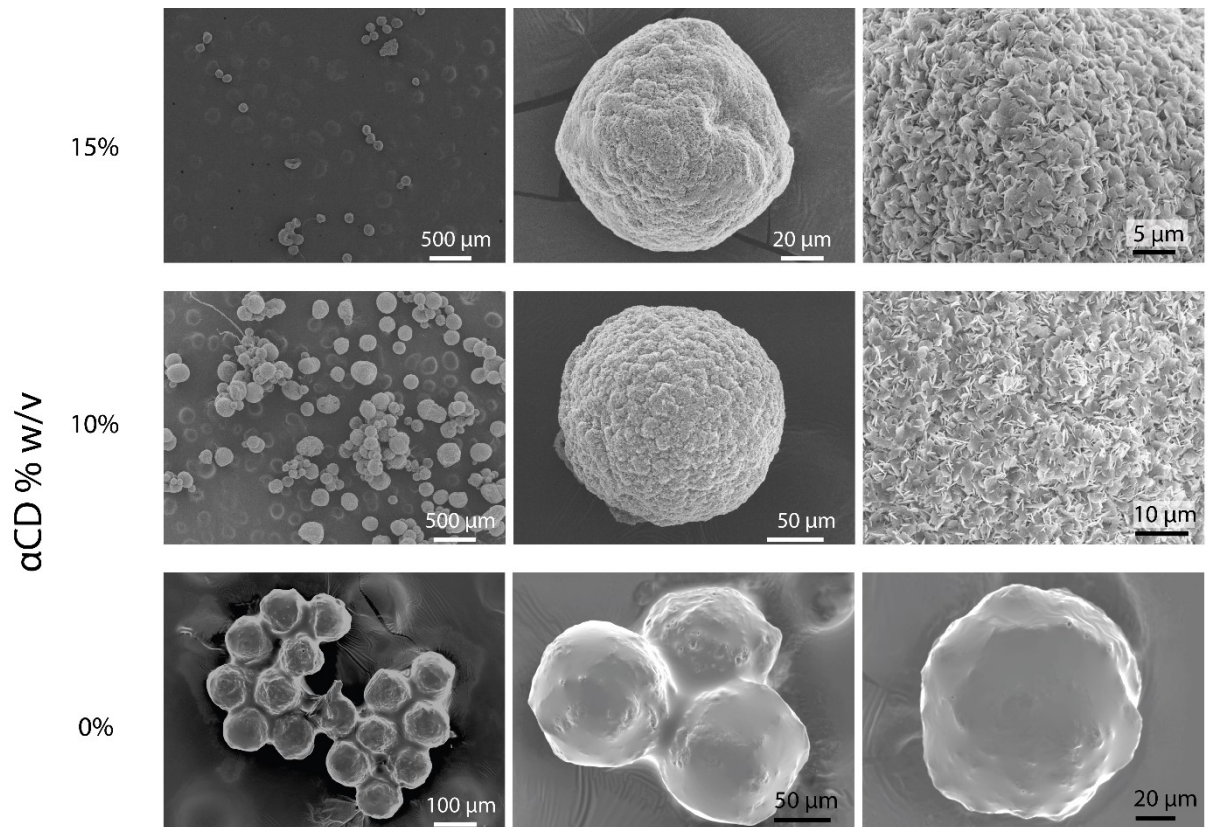

**Figure S7.** SEM images of 0, 10, 15% wt/v  $\alpha$ CD GPR microgels after purification.

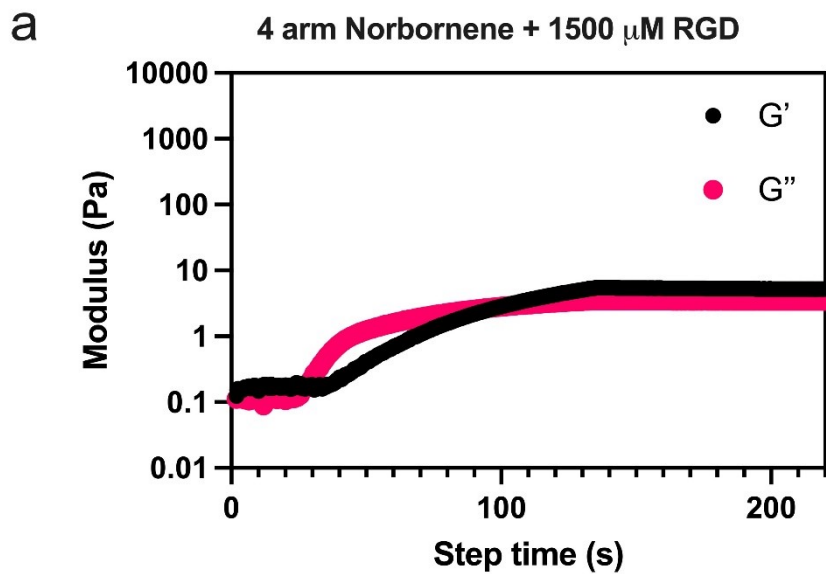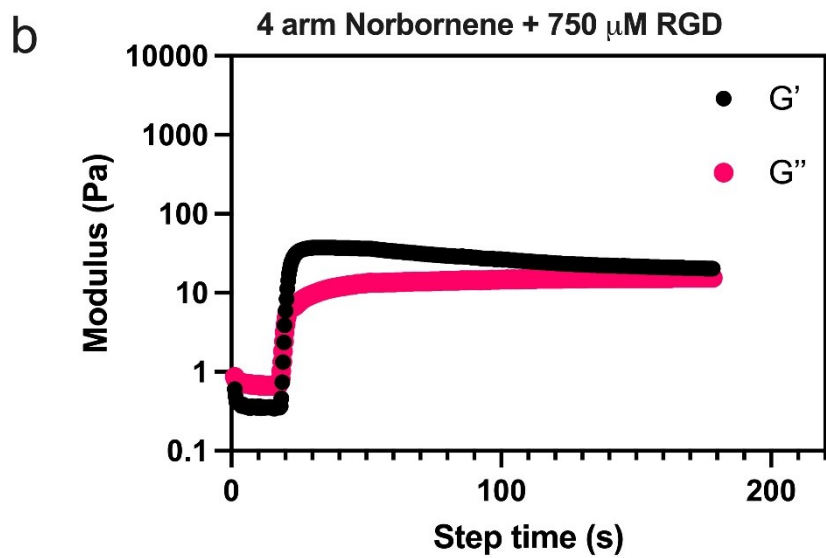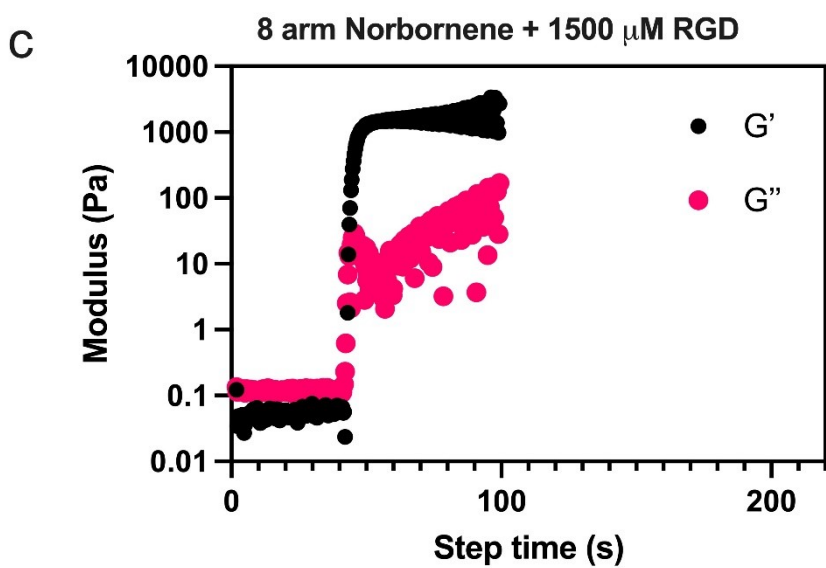

**Figure S8.** Hydrogel gelation kinetics for different formulations of (15% wt/v  $\alpha$ CD) polyrotaxane bulk hydrogels with (a) 4 arm norbornene (1.64 mM) and RGD (1500  $\mu$ M) (b) 4 arm norbornene (1.5 mM) and RGD (750  $\mu$ M) and (c) 8 arm norbornene (0.273 mM) and RGD (1500  $\mu$ M) in MilliQ with 2 mM LAP. The concentration of thiol to norbornene functional groups was kept at 1:1.

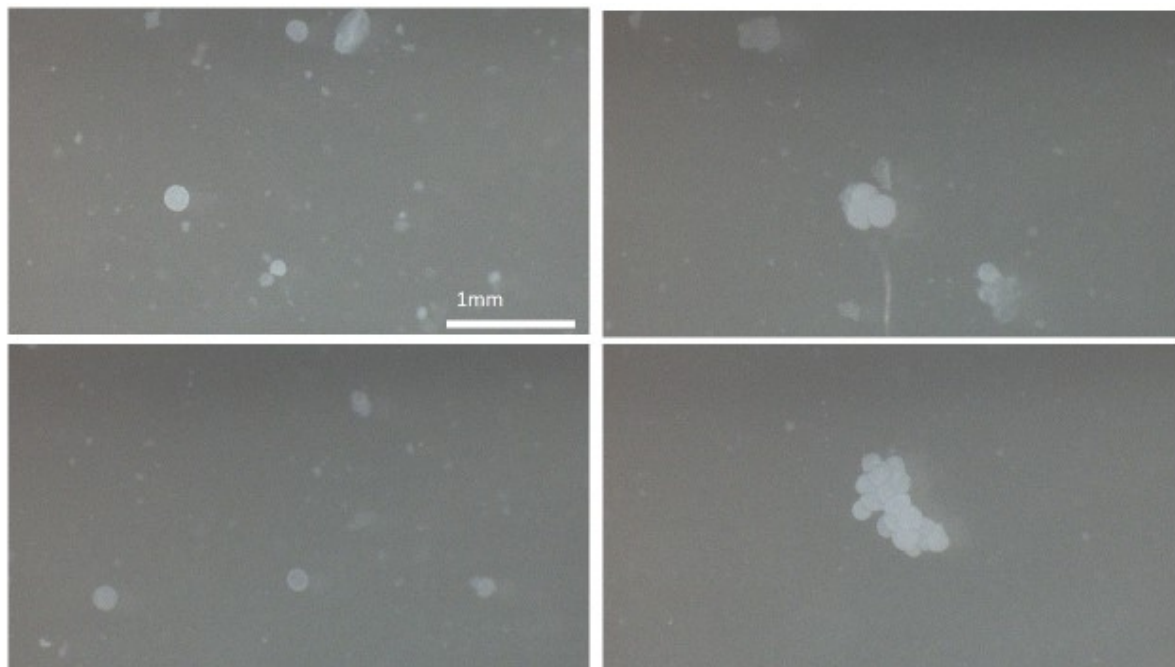

**Figure S9.** 8 arm RGD GPR microgels in water.

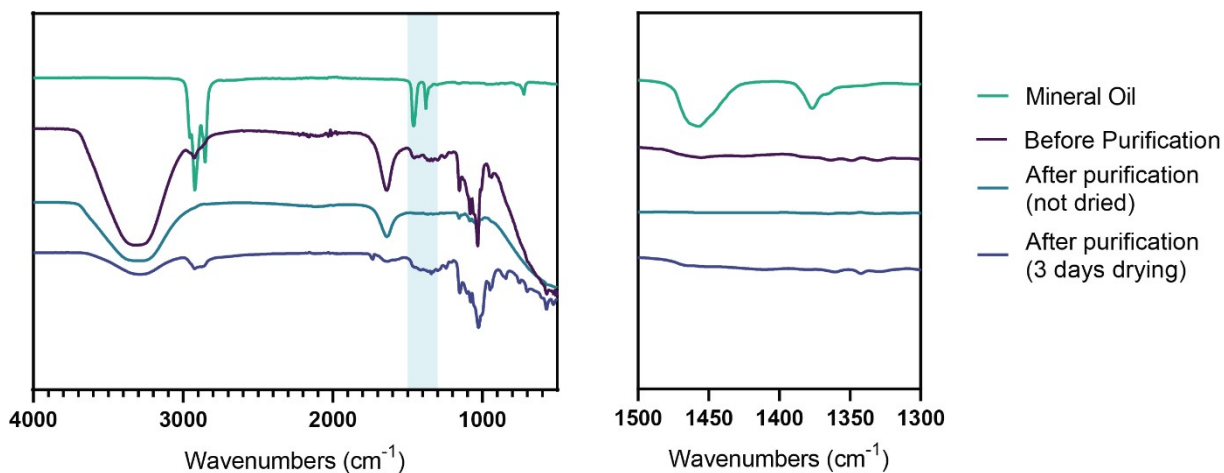

**Figure S10.** FTIR of purified GPR showcasing oil removal from GPR after synthesis. Residual oil removed after purification.

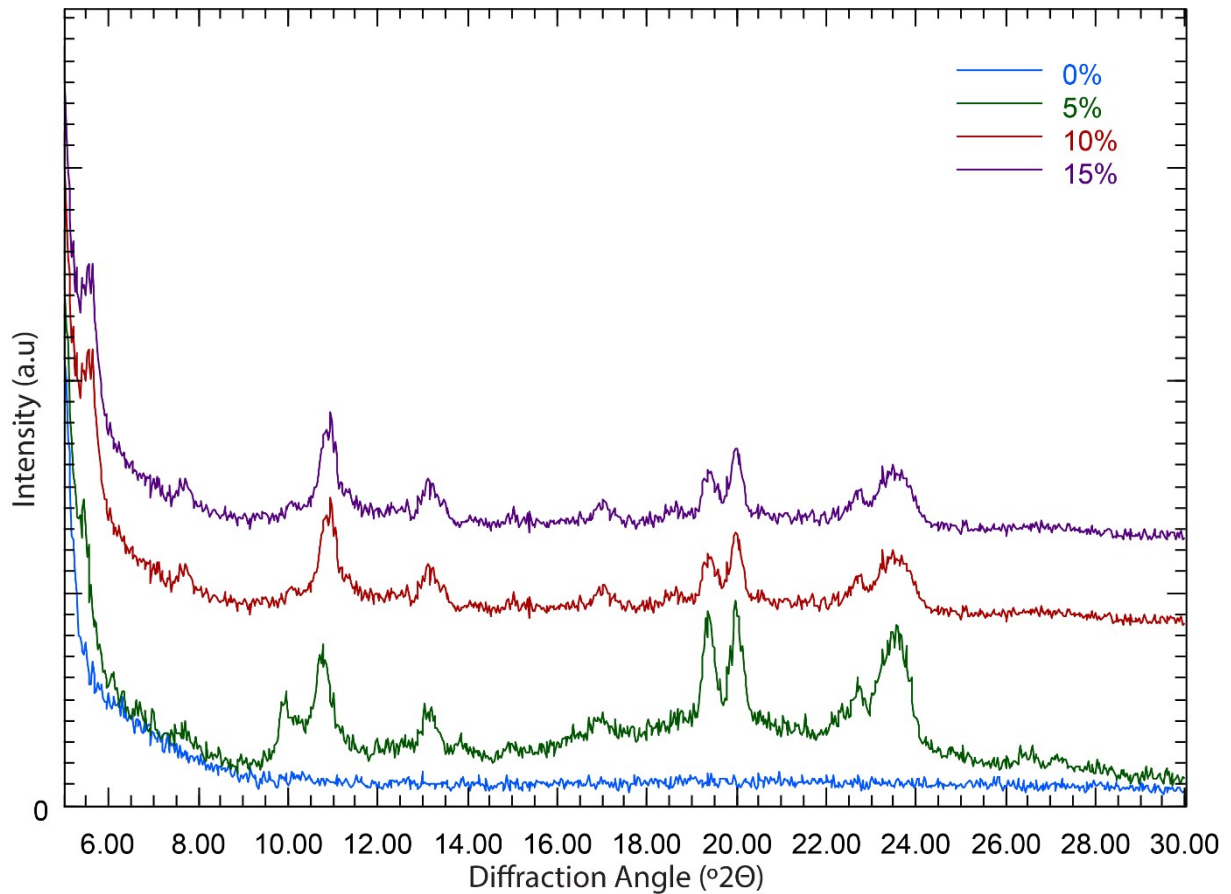

**Figure S11.** XRD of GPR dried microgels. No diffraction patterns observed for PEG microgels (0%  $\alpha$ CD). Diffraction patterns appear with addition of 5 – 15%  $\alpha$ CD.

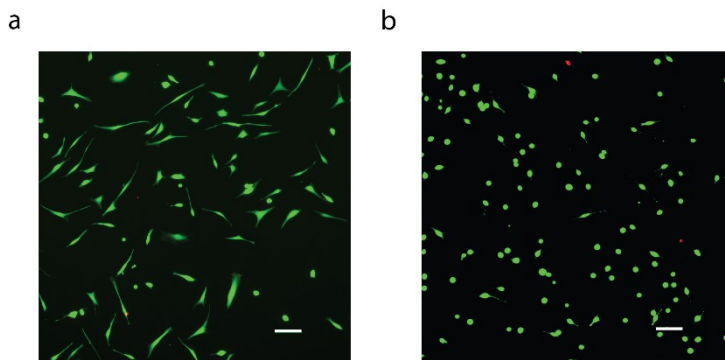

**Figure S12.** (a) Live/dead images of corneal keratocytes in differentiation media. (b) Morphological changes in human corneal keratocytes after 24 hours exposed to GPR supernatant. Scale bar = 100  $\mu$ m.



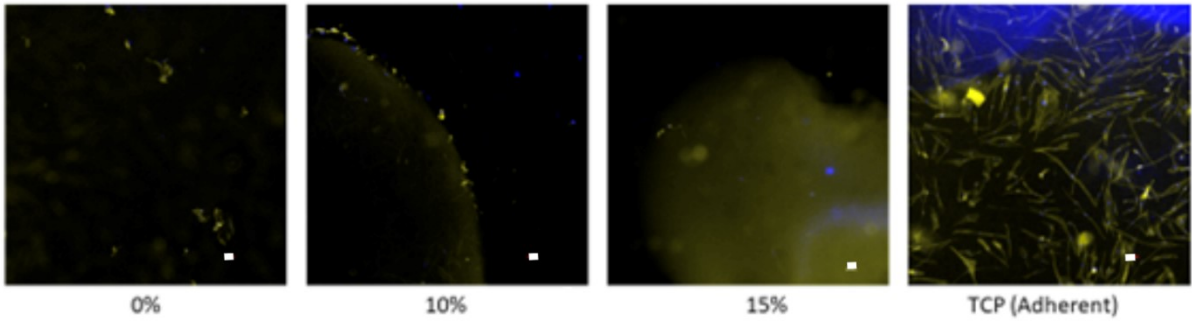

**Figure S13.** Bulk PR hydrogels after 2 weeks in culture with immortalized human corneal keratocytes indicating little to no adherence of cells to the bulk gel. Scale bar = 100  $\mu$ m.

### Degradation by Hydrolysis

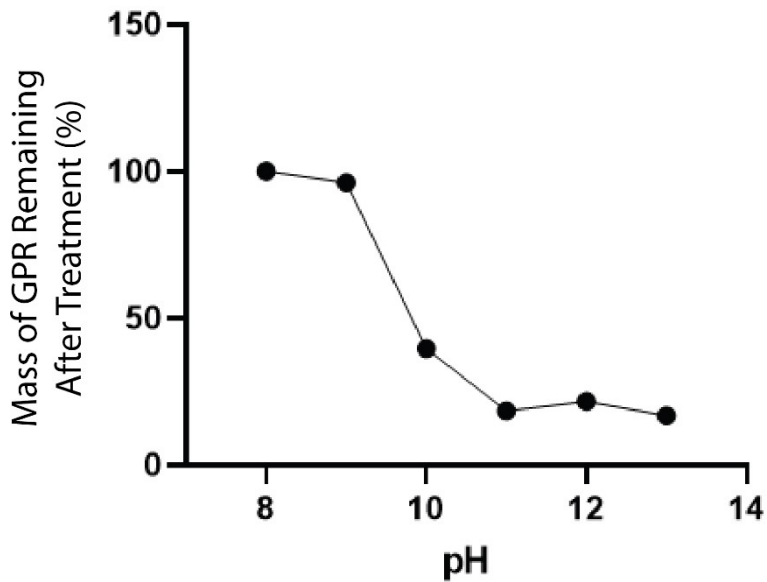

**Figure S14.** Degradability of GPR through basic hydrolysis monitored by mass loss.

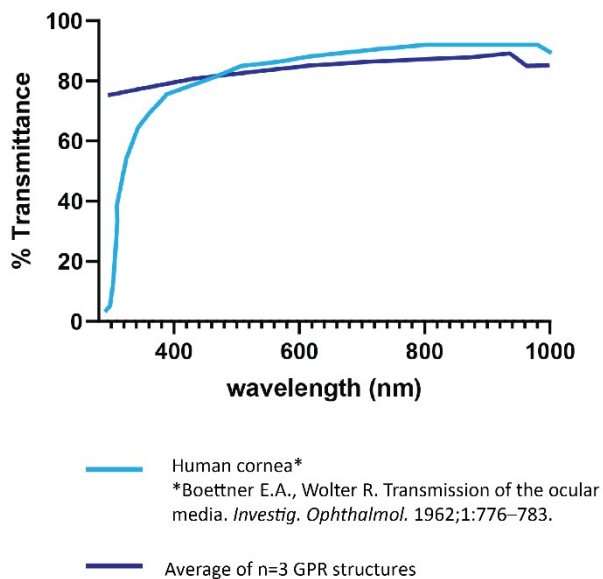

**Figure S15.** % Transmittance obtained by UV-Vis spectroscopy of the GPR structures after 2 weeks in culture compared to the human cornea.
